# Supplementary material
Source: publisher site journal article supplement (https://www.spandidos-publications.com/4428/downloadSupplementary)

Figure S1. Schematic diagram of the generation of HIFs, CAFs, CAFs (sudachitin) and their CMs. (A) Method for CAF-CM collection. (B) Method for CAF (sudachitin)-CM collection. (C) The method for HIF-CM collection. HIFs, human intestinal fibroblasts; CAFs, cancer-associated fibroblasts; CM, conditioned medium; RT-qPCR, transcription-quantitative PCR analysis.

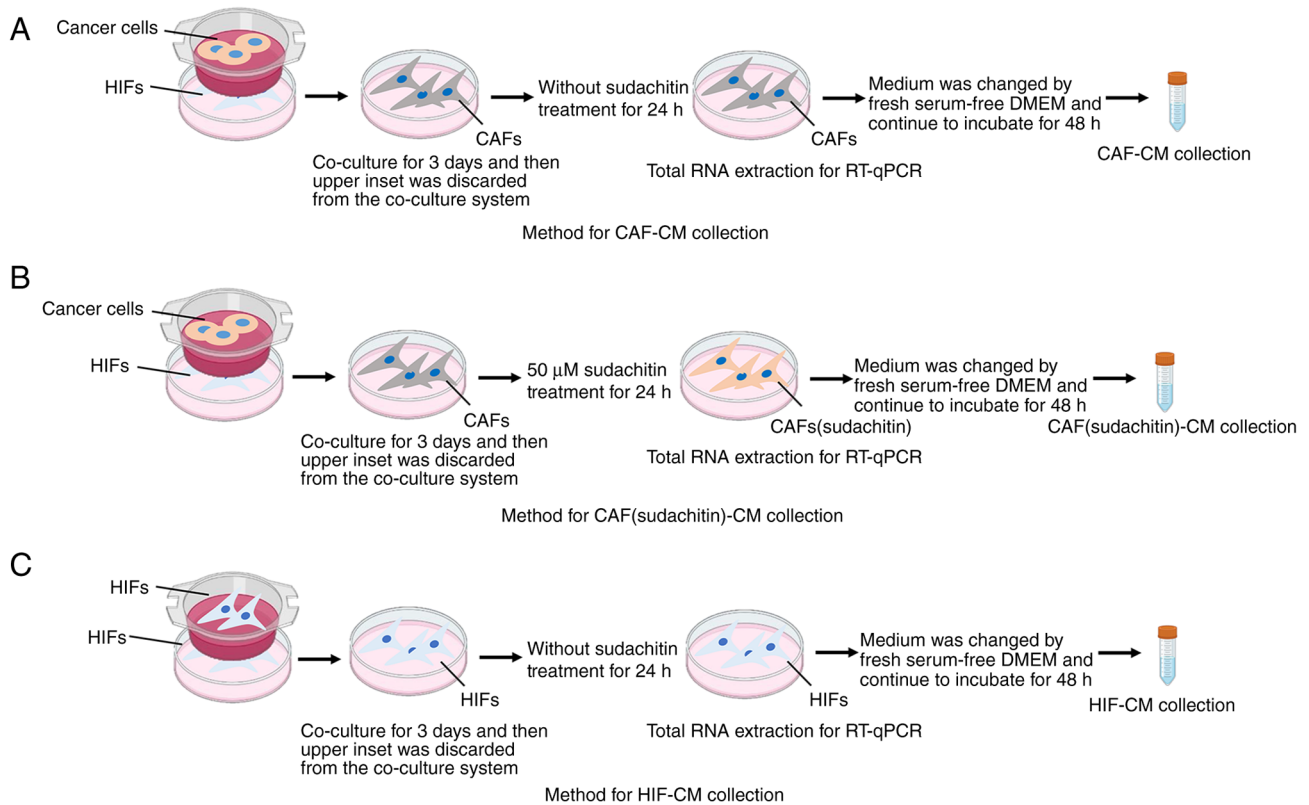

Supplement: Supplementary file 1 [file downloadSupplementary]
